# Supplementary material for: Description of subgroup reporting in clinical trials of chronic diseases: a meta-epidemiological study
Source: HighWire-hosted journal article supplement (doi:10.1136/bmjopen-2023-081315), 2024-06-01
Supplement: bmjopen-2023-081315supp001_data_supplement.pdf [file bmjopen-2023-081315supp001_data_supplement.pdf]

# A description of subgroup reporting in clinical trials of chronic diseases: a meta-epidemiological study.

## Supplementary material

Lili Wei<sup>1\*</sup>, Elaine W Butterly<sup>1</sup>, Jesús Rodríguez Pérez<sup>1</sup>, Avirup Chowdhury<sup>2</sup>, Richard Shemilt<sup>1</sup>, Peter Hanlon<sup>1</sup>, David A McAllister<sup>1</sup>

<sup>1</sup>School of Health and Wellbeing, University of Glasgow, UK

<sup>2</sup>The Institute of Cancer Research, UK

\* Corresponding author

Dr Lili Wei

School of Health and Wellbeing, University of Glasgow

Clarice Pears Building, 90 Byres Road, G12 8TB, Glasgow, United Kingdom

[Lili.Wei@glasgow.ac.uk](mailto:Lili.Wei@glasgow.ac.uk)

+44 (0) 141-330- 3299

Contents

Identifying trials, papers and subgroups. .... 3

    Identifying eligible trials from clinicaltrials.gov. .... 3

        Supplementary Table 1. Search criteria to identify trials from clinicaltrials.gov. .... 3

        Supplementary Table 2. Included conditions, Medical Subject Heading (MeSH) terms and MeSH codes. .... 4

    Screening eligible trials for reporting results. .... 7

        Supplementary Figure 1. The screening of eligible trials with reported results. .... 7

    Screening eligible trials/papers with reported results for reporting subgroups. .... 7

    Obtaining standard format for tables obtained from eligible papers. .... 7

    Assigning MeSH terms ..... 8

Results. .... 8

    Subgroup reporting summary statistics. .... 8

        Supplementary Table 3. The proportion of subgroup reporting and commonest subgroups in each index condition. .... 8

    Coefficients from regression models. .... 11

        Supplementary Table 4.1. Coefficients from the total number of subgroups model. .... 11

        Supplementary Table 4.2. Coefficients from subgroup reporting (any vs none) model. .... 12

        Supplementary Table 4.3. Coefficients from overall results reporting (any vs none) model. .... 13

Identifying trials, papers and subgroups.

Identifying eligible trials from clinicaltrials.gov.

Supplementary Table 1. Search criteria to identify trials from clinicaltrials.gov.

| Criteria                                                                                                                                                                                                                   | Trials |
|----------------------------------------------------------------------------------------------------------------------------------------------------------------------------------------------------------------------------|--------|
| Start date >= 1990-01-01                                                                                                                                                                                                   | 16957  |
| Study type – interventional.<br>Status – ‘Active, not recruiting’, ‘Completed’, ‘Terminated’.<br>Phase – 2/3, 3 or 4<br>Enrolment >= 300 (or start date < ‘2005-01-01’)<br>Participants not excluded for being 60 or older | 13079  |
| Study design is “Factorial Assignment”, “Parallel Assignment” and “allocation random”                                                                                                                                      | 10841  |
| Selected MeSH conditions ( <i>see below</i> ) found in study title or in browse conditions or conditions table                                                                                                             | 4348   |
| Intervention type is “Biological” or “Drug”                                                                                                                                                                                | 3872   |

Conditions were eligible if the string (or the reverse of the string e.g. “Angina, Unstable” or “Unstable angina”) corresponding to one or more the following MESH terms (or to a more specific terms in the MESH hierarchy) was found:

C05.116.198.579, C05.116.900.853.625.800, C05.550.114, C05.799.114, C05.799.414, C05.799.613, C06.405.117.119.500.204, C06.405.117.119.500.432, 06.405.117.119.500.450, C06.405.117.119.500.484, C06.405.117.119.500.484.500, C06.405.117.119.500.742, C06.405.117.620, C06.405.205.265.231, C06.405.205.731, C06.405.469.432, C06.405.608.348, C06.405.748.240, C06.405.748.398, C06.552.380.350.050, C08.127.108, C08.127.384, C08.127.446.567, C08.381.423, C08.381.483.487, C08.381.483.487.500, C08.381.495, C08.381.746, C08.381.765, C08.460.799, C08.674.095, C08.730.099.567, C09.603.799.315, C10.114.375.500, C10.228.140.079.862, C10.228.140.300.150, C10.228.140.300.275.800, C10.228.140.300.400, C10.228.140.300.510.200.325, C10.228.140.300.510.200.387, C10.228.140.300.510.200.418, C10.228.140.300.510.800.500, C10.228.140.300.775, C10.228.140.380.100, C10.228.140.380.230, C10.228.140.490, C10.228.140.546.399.750, C10.228.662.600, C10.574.812, C10.574.945.249, C10.803, C12.294.565.500, C12.777.419.192, C12.777.829.866, C12.777.934.284, C12.777.934.852, C13.351.968.829.813, C13.351.968.934.252, C13.351.968.934.814, C14.280.067.198, C14.280.067.248, C14.280.434, C14.280.647, C14.907.137.126.307, C14.907.137.126.307.500, C14.907.137.126.339, C14.907.137.126.372.500, C14.907.137.126.669, C14.907.253.092.477.200, C14.907.253.560.350.500, C14.907.253.855, C14.907.355, C14.907.355.350.700, C14.907.355.590, C14.907.355.830, C14.907.489, C14.907.585, C14.907.617, C17.300.480, C17.300.540, C17.300.775, C17.300.799, C17.800.784, C17.800.784.602, C17.800.784.801, C17.800.784.801.500, C17.800.859.675, C17.800.862.945, C18.452.394.750, C18.452.584.500.500.396, C18.452.584.500.500.438, C18.452.584.500.500.851, C18.452.648.398.450, C19.246.267, C19.246.300, C20.111.193, C20.111.197, C20.111.198, C20.111.199, C20.111.258.250.500, C20.111.327, C20.111.567, C20.543.480.680.095, C20.543.480.680.443, F03.087.400, or F03.675.700.

Using the normalised names, we used a combination of string comparison functions and manual review to restrict the set of trials to those where one or more arm-comparison compared eligible drugs (or classes), or compared an eligible drug to either placebo, usual-care or a “standard comparator”.

After removing trials without eligible drugs and selecting enrolment >=300 (in free text fields), we got a final “denominator” dataset of 2235 clinical trials.

Supplementary Table 2. Included conditions, Medical Subject Heading (MeSH) terms and MeSH codes.

| Category                            | MeSH term                          | Code                        |
|-------------------------------------|------------------------------------|-----------------------------|
| Musculoskeletal diseases [C05]      | Osteoporosis                       | C05.116.198.579             |
|                                     | Spondyloarthropathies              | C05.116.900.853.625.800     |
|                                     | Arthritis                          | C05.550.114                 |
|                                     | Arthritis, Rheumatoid Gout         | C05.799.114                 |
|                                     | Osteoporosis                       | C05.799.414                 |
| Digestive system diseases [C06]     | CREST Syndrome                     | C06.405.117.119.500.204     |
|                                     | Oesophageal Achalasia              | C06.405.117.119.500.432     |
|                                     | Oesophageal spasm, diffuse         | C06.405.117.119.500.450     |
|                                     | Gastro-oesophageal reflux          | C06.405.117.119.500.484     |
|                                     | Laryngopharyngeal reflux           | C06.405.117.119.500.484.500 |
|                                     | Plummer-Vinson Syndrome            | C06.405.117.119.500.742     |
|                                     | Oesophagitis                       | C06.405.117.620             |
|                                     | Colitis, Ulcerative                | C06.405.205.265.231         |
|                                     | Inflammatory Bowel Diseases        | C06.405.205.731             |
|                                     | Inflammatory Bowel diseases        | C06.405.469.432             |
|                                     | Oesophagitis, peptic               | C06.405.608.348             |
|                                     | Duodenogastric reflux              | C06.405.748.240             |
|                                     | Gastritis                          | C06.405.748.398             |
|                                     | Hepatitis, autoimmune              | C06.552.380.350.050         |
| Respiratory Tract Diseases [C08]    | Asthma                             | C08.127.108                 |
|                                     | Bronchiectasis                     | C08.127.384                 |
|                                     | Bronchitis, chronic                | C08.127.446.567             |
|                                     | Hypertension, Pulmonary            | C08.381.423                 |
|                                     | Idiopathic Interstitial Pneumonias | C08.381.483.487             |
|                                     | Idiopathic Pulmonary Fibrosis      | C08.381.483.487.500         |
|                                     | Lung Diseases, Obstructive         | C08.381.495                 |
|                                     | Pulmonary Embolism                 | C08.381.746                 |
|                                     | Pulmonary Fibrosis                 | C08.381.765                 |
|                                     | Rhinitis                           | C08.460.799                 |
|                                     | Asthma                             | C08.674.095                 |
|                                     | Bronchitis, Chronic                | C08.730.099.567             |
| Otorhinolaryngologic Diseases [C09] | Rhinitis, Allergic                 | C09.603.799.315             |

|                               |                                       |                             |
|-------------------------------|---------------------------------------|-----------------------------|
| Nervous System Diseases [C10] | Multiple Sclerosis                    | C10.114.375.500             |
|                               | Parkinsonian Disorders                | C10.228.140.079.862         |
|                               | Brain Ischaemia                       | C10.228.140.300.150         |
|                               | Stroke, Lacunar                       | C10.228.140.300.275.800     |
|                               | Dementia, Vascular                    | C10.228.140.300.400         |
|                               | Infarction, Anterior Cerebral Artery  | C10.228.140.300.510.200.325 |
|                               | Infarction, Middle Cerebral Artery    | C10.228.140.300.510.200.387 |
|                               | Infarction, Posterior Cerebral Artery | C10.228.140.300.510.200.418 |
|                               | Dementia, Vascular                    | C10.228.140.300.510.800.500 |
|                               | Stroke                                | C10.228.140.300.775         |
|                               | Alzheimer Disease                     | C10.228.140.380.100         |
|                               | Dementia, Vascular                    | C10.228.140.380.230         |
|                               | Epilepsy                              | C10.228.140.490             |
|                               | Migraine Disorders                    | C10.228.140.546.399.750     |
|                               | Parkinsonian Disorders                | C10.228.662.600             |
|                               | Parkinson Disease                     | C10.574.812                 |
|                               | Alzheimer Disease                     | C10.574.945.249             |
|                               | Restless Leg Syndrome                 | C10.803                     |
| Urogenital Diseases [C12]     | Prostatic Hyperplasia                 | C12.294.565.500             |
|                               | Diabetic Nephropathies                | C12.777.419.192             |
|                               | Urinary Bladder, Overactive           | C12.777.829.866             |
|                               | Enuresis                              | C12.777.934.284             |
|                               | Urinary Incontinence                  | C12.777.934.852             |
|                               | Urinary Bladder, Overactive           | C13.351.968.829.813         |
|                               | Enuresis                              | C13.351.968.934.252         |
|                               | Urinary Incontinence                  | C13.351.968.934.814         |
| Cardiovascular Diseases [C14] | Atrial Fibrillation                   | C14.280.067.198             |
|                               | Atrial Flutter                        | C14.280.067.248             |
|                               | Heart Failure                         | C14.280.434                 |
|                               | Myocardial Ischaemia                  | C14.280.647                 |
|                               | Atherosclerosis                       | C14.907.137.126.307         |
|                               | Peripheral Arterial Disease           | C14.907.137.126.307.500     |
|                               | Coronary Artery Disease               | C14.907.137.126.339         |
|                               | Dementia, Vascular                    | C14.907.137.126.372.500     |
|                               | Intermittent Claudication             | C14.907.137.126.669         |
|                               | Cerebral Infarction                   | C14.907.253.092.477.200     |
|                               | Dementia, Vascular                    | C14.907.253.560.350.500     |

|                                           |                                                            |                         |
|-------------------------------------------|------------------------------------------------------------|-------------------------|
|                                           | Stroke                                                     | C14.907.253.855         |
|                                           | Embolism and Thrombosis                                    | C14.907.355             |
|                                           | Pulmonary Embolism                                         | C14.907.355.350.700     |
|                                           | Thromboembolism                                            | C14.907.355.590         |
|                                           | Thrombosis                                                 | C14.907.355.830         |
|                                           | Hypertension                                               | C14.907.489             |
|                                           | Myocardial Ischaemia                                       | C14.907.585             |
|                                           | Peripheral Vascular Diseases                               | C14.907.617             |
| Skin and Connective Tissue Diseases [C17] | Lupus Erythematosus, Systemic                              | C17.300.480             |
|                                           | Mixed Connective Tissue Disease                            | C17.300.540             |
|                                           | Rheumatic Diseases                                         | C17.300.775             |
|                                           | Scleroderma, Systemic                                      | C17.300.799             |
|                                           | Scleroderma, Systemic                                      | C17.800.784             |
|                                           | Scleroderma, Diffuse                                       | C17.800.784.602         |
|                                           | Scleroderma, Limited                                       | C17.800.784.801         |
|                                           | CREST Syndrome                                             | C17.800.784.801.500     |
|                                           | Psoriasis                                                  | C17.800.859.675         |
|                                           | Urticaria                                                  | C17.800.862.945         |
| Nutritional and Metabolic Diseases [C18]  | Diabetes Mellitus                                          | C18.452.394.750         |
|                                           | Hypercholesterolemia                                       | C18.452.584.500.500.396 |
|                                           | Hyperlipidaemia, Familial Combined                         | C18.452.584.500.500.438 |
|                                           | Hypertriglyceridemia                                       | C18.452.584.500.500.851 |
|                                           | Hyperlipidaemia, Familial Combined                         | C18.452.648.398.450     |
| Endocrine System Diseases [C19]           | Diabetes Mellitus, Type 1                                  | C19.246.267             |
|                                           | Diabetes Mellitus, Type 2                                  | C19.246.300             |
| Immune System Diseases [C20]              | Anti-Neutrophil Cytoplasmic Antibody-Associated Vasculitis | C20.111.193             |
|                                           | Antiphospholipid Syndrome                                  | C20.111.197             |
|                                           | Arthritis, Juvenile                                        | C20.111.198             |
|                                           | Arthritis, Rheumatoid                                      | C20.111.199             |
|                                           | Multiple Sclerosis                                         | C20.111.258.250.500     |
|                                           | Diabetes Mellitus, Type 1                                  | C20.111.327             |
|                                           | Hepatitis, Autoimmune                                      | C20.111.567             |
|                                           | Asthma                                                     | C20.543.480.680.095     |
|                                           | Rhinitis, Allergic                                         | C20.543.480.680.443     |

Screening eligible trials for reporting results.

Supplementary Figure 1. The screening of eligible trials with reported results.

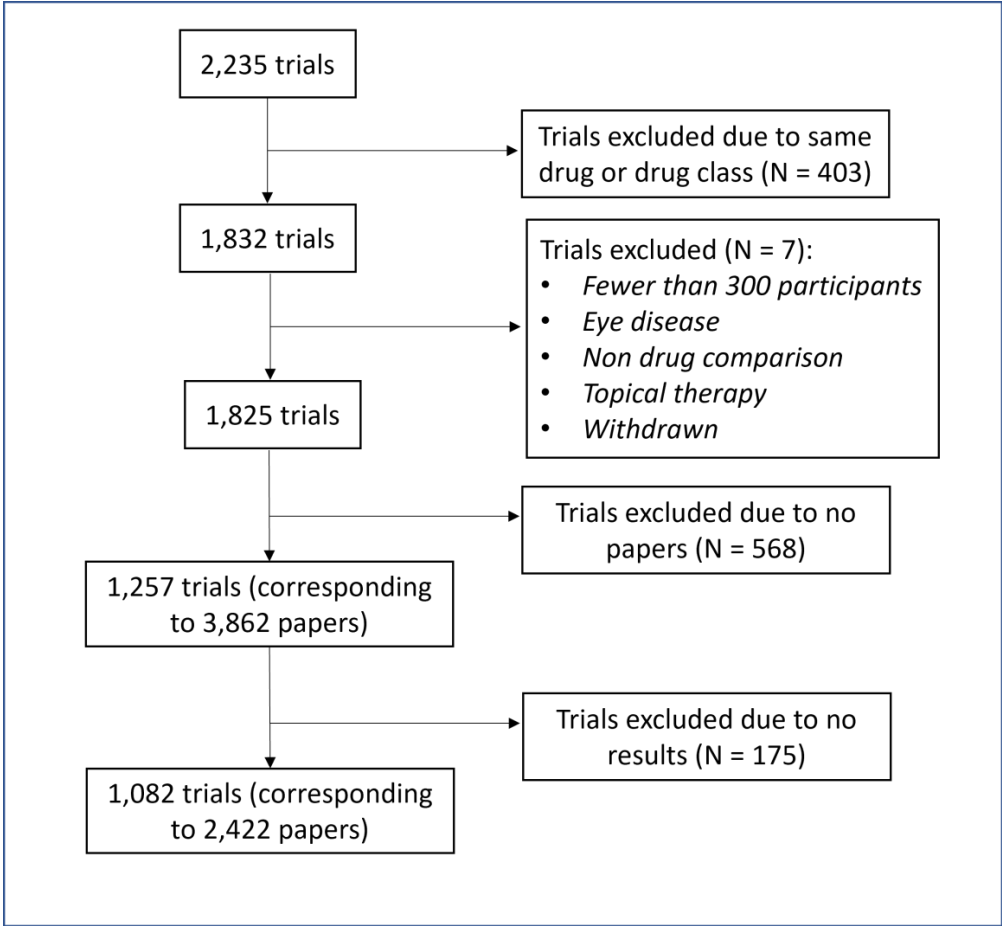

Screening eligible trials/papers with reported results for reporting subgroups.

2,422 papers with reported results obtained from the above screening process were then underwent the screening of subgroups analyses showed in Figure 1 in the main paper.

Obtaining standard format for tables obtained from eligible papers.

907 papers contain subgroup reporting after screening, as showed in Figure 1 in the main paper. Tables from these 907 papers in tabular format were uploaded to TableTidier (<https://tabletidier.org/>), a software designed to assist with extracting and standardising tables into a machine-readable format. Subsequently, each subgroup term was assigned a Concept Unique Identifier for a Metathesaurus concept (CUI). For example, if a table contains “sex” as a subgroup name and “woman” and “man” as subgroup levels, they are assigned CUI C0079399 [Gender Identity] as one subgroup. Therefore, synonyms used across the papers are harmonised allowing comparisons across different papers, trials and disease conditions.

Assigning MeSH terms

After obtaining CUIs for each subgroup, we harmonised them and assigned the closest MeSH or WHOATC code. Additionally, we supplemented certain CUIs with additional information if they included disease severity, duration, etc. Finally, these MeSH terms underwent clinical review.

Results.

Subgroup reporting summary statistics.

Supplementary Table 3. The proportion of subgroup reporting and commonest subgroups in each index condition.

| Conditions                             | Total subgroups | The proportion of subgroup reporting among 2,235 trials<br>n <sub>T</sub> /N (%) | The proportion of subgroup reporting among 1,082 trials with results reporting<br>n <sub>R</sub> /N <sub>R</sub> (%) | Five commonest subgroups in each condition                                                                                                        |
|----------------------------------------|-----------------|----------------------------------------------------------------------------------|----------------------------------------------------------------------------------------------------------------------|---------------------------------------------------------------------------------------------------------------------------------------------------|
| Myocardial Infarction                  | 99              | 26/47 (55%)                                                                      | 25/30 (83%)                                                                                                          | Age Factors (96.2%); Diabetes Mellitus (88.5%); Gender Identity (88.5%); <b>Myocardial Infarction (69.2%)</b> ; Hypertension (30.8%)              |
| Diabetes Mellitus, Type 2              | 89              | 120/460 (26%)                                                                    | 117/235 (50%)                                                                                                        | Age Factors (49.17%); Glycated Hemoglobin A (48.33%); Gender Identity (39.17%); Body Mass Index (36.67%); Racial Groups (36.67%)                  |
| Coronary Artery Disease                | 77              | 27/80 (34%)                                                                      | 27/46 (59%)                                                                                                          | Diabetes Mellitus (85.2%); Age Factors (74.1%); Gender Identity (74.1%); Myocardial Infarction (37.0%); Hypertension (33.3%)                      |
| Hypertension                           | 64              | 44/247 (18%)                                                                     | 44/98 (45%)                                                                                                          | Age Factors (59.1%); Gender Identity (52.3%); Diabetes Mellitus (38.6%); Racial Groups (36.4%); Blood Pressure (27.3%)                            |
| Heart Failure                          | 51              | 17/40 (42%)                                                                      | 17/27 (63%)                                                                                                          | Age Factors (70.6%); Diabetes Mellitus (64.7%); Gender Identity (64.7%); Stroke Volume (58.8%); <b>Heart Failure (52.9%)</b>                      |
| Hypercholesterol emia                  | 48              | 28/72 (39%)                                                                      | 28/43 (65%)                                                                                                          | Lipoproteins (71.4%); Diabetes Mellitus (67.9%); Age Factors (64.3%); Gender Identity (60.7%); Body Mass Index (53.6%)                            |
| Atrial Fibrillation                    | 46              | 13/39 (33%)                                                                      | 13/20 (65%)                                                                                                          | Age Factors (61.5%); Gender Identity (53.8%); Heart Failure (53.8%); <b>Atrial Fibrillation (46.2%)</b> ; Hypertension (38.5%)                    |
| Pulmonary Disease, Chronic Obstructive | 40              | 40/186 (22%)                                                                     | 39/96 (41%)                                                                                                          | <b>Pulmonary Disease, Chronic Obstructive (75.0%)</b> ; Age Factors (50.0%); Cigarette Smoking (45.0%); Gender Identity (42.5%); Steroids (40.0%) |
| Acute Coronary Syndrome                | 37              | 9/22 (41%)                                                                       | 9/10 (90%)                                                                                                           | Age Factors (89%); Gender Identity (78%); Diabetes Mellitus (67%); Myocardial Infarction (56%); Percutaneous Coronary Intervention (56%)          |
| Arthritis, Rheumatoid                  | 35              | 28/106 (26%)                                                                     | 28/65 (43%)                                                                                                          | <b>Arthritis, Rheumatoid (46.4%)</b> ; Age Factors (25.0%); Gender Identity (21.4%);                                                              |



|                                 |    |              |             |                                                                                                                                                         |
|---------------------------------|----|--------------|-------------|---------------------------------------------------------------------------------------------------------------------------------------------------------|
|                                 |    |              |             | Immunosuppressive Agents (21.4%); C-Reactive Protein (17.9%)                                                                                            |
| Stroke                          | 35 | 8/20 (40%)   | 8/13 (62%)  | <b>Stroke (88%)</b> ; Age Factors (62%); Gender Identity (62%); Diabetes Mellitus (38%); Hypertension (38%)                                             |
| Atherosclerosis                 | 30 | 2/9 (22%)    | 2/3 (67%)   | Age Factors (100%); Body Mass Index (100%); Cigarette Smoking (100%); Diabetes Mellitus (100%); Gender Identity (100%)                                  |
| Crohn Disease                   | 29 | 11/18 (61%)  | 11/16 (69%) | Immunosuppressive Agents (63.6%); Tumor Necrosis Factor Inhibitors (63.6%); C-Reactive Protein (54.5%); <b>Crohn Disease (45.5%)</b> ; Steroids (45.5%) |
| Osteoporosis                    | 29 | 11/44 (25%)  | 11/23 (48%) | Age Factors (54.5%); Fractures, Bone (54.5%); <b>Osteoporosis (45.5%)</b> ; Body Mass Index (27.3%); Geographic Locations (27.3%)                       |
| Prostatic Hyperplasia           | 28 | 9/30 (30%)   | 9/15 (60%)  | Body Mass Index (44%); Age Factors (33%); Erectile Dysfunction (33%); Adrenergic alpha-Antagonists (22%); Antihypertensive Agents (22%)                 |
| Peripheral Arterial Disease     | 24 | 3/8 (38%)    | 3/4 (75%)   | Diabetes Mellitus (67%); Age Factors (33%); Ankle Brachial Index (33%); Blood Pressure (33%); Body Weight (33%)                                         |
| Venous Thromboembolism          | 23 | 7/36 (19%)   | 7/8 (88%)   | Age Factors (86%); Gender Identity (86%); <b>Venous Thromboembolism (57%)</b> ; Anticoagulants (43%); Body Weight (43%)                                 |
| Asthma                          | 22 | 19/147 (13%) | 19/62 (31%) | <b>Asthma (31.6%)</b> ; Eosinophilia (31.6%); Steroids (26.3%); Age Factors (21.1%); Gender Identity (21.1%)                                            |
| Colitis, Ulcerative             | 21 | 8/14 (57%)   | 8/12 (67%)  | Steroids (62%); Tumor Necrosis Factor Inhibitors (62%); C-Reactive Protein (38%); Gender Identity (38%); Age Factors (25%)                              |
| Psoriasis                       | 19 | 13/62 (21%)  | 13/37 (35%) | Immunosuppressive Agents (38.5%); <b>Psoriasis (38.5%)</b> ; Tumor Necrosis Factor Inhibitors (30.8%); Biological Therapy (15.4%); Cyclosporins (15.4%) |
| Diabetes Mellitus (unspecified) | 16 | 8/36 (22%)   | 8/15 (53%)  | Age Factors (75%); Body Mass Index (75%); Gender Identity (75%); Racial Groups (62%); Glycated Hemoglobin A (38%)                                       |
| Osteoarthritis                  | 14 | 6/64 (9%)    | 6/26 (23%)  | Age Factors (50%); Arthritis, Rheumatoid (50%); Diabetes Mellitus (33%); Gender Identity (33%); Pain (33%)                                              |
| Urticaria                       | 12 | 2/3 (67%)    | 2/3 (67%)   | Age Factors (50%); Angioedema (50%); Autoantibodies (50%); Body Weight (50%); Gender Identity (50%)                                                     |
| Diabetes Mellitus, Type 1       | 11 | 7/35 (20%)   | 7/17 (41%)  | Glycated Hemoglobin A (57%); Insulin (43%); Age Factors (29%); Body Mass Index (29%); Glucose (29%)                                                     |
| Hyperlipidemias                 | 11 | 1/7 (14%)    | 1/4 (25%)   | Age Factors (100%); C-Reactive Protein (100%); Diabetes Mellitus (100%); Gender Identity (100%); Geographic Locations (100%)                            |
| Pulmonary Embolism              | 11 | 1/2 (50%)    | 1/1 (100%)  | Age Factors (100%); Body Mass Index (100%); Fibrin Fibrinogen Degradation Products (100%); Gender Identity (100%); Neoplasms (100%)                     |
| Lupus Erythematosus, Systemic   | 10 | 4/8 (50%)    | 4/5 (80%)   | Autoantibodies (50%); Racial Groups (50%); Steroids (50%); Albuminuria (25%); Antimalarials (25%)                                                       |
| Arthritis, Psoriatic            | 9  | 3/5 (60%)    | 3/4 (75%)   | Immunosuppressive Agents (67%); Antirheumatic Agents (33%); Arthritis, Juvenile (33%); <b>Arthritis, Psoriatic (33%)</b> ; Arthritis, Rheumatoid (33%)  |

|                                    |   |            |            |                                                                                                                                                    |
|------------------------------------|---|------------|------------|----------------------------------------------------------------------------------------------------------------------------------------------------|
| Gastroesophageal Reflux            | 9 | 5/29 (17%) | 5/8 (62%)  | Body Mass Index (40%); Age Factors (20%); Gastrointestinal Diseases (20%); Gender Identity (20%); Heartburn (20%)                                  |
| Seizures                           | 9 | 6/31 (19%) | 6/12 (50%) | Anticonvulsants (83%); Age Factors (50%); other antiepileptics (50%); Racial Groups (33%); Gender Identity (17%)                                   |
| Spondylitis, Ankylosing            | 9 | 3/15 (20%) | 3/8 (38%)  | C-Reactive Protein (67%); Tumor Necrosis Factor Inhibitors (67%); Arthritis (33%); Cigarette Smoking (33%); Gender Identity (33%)                  |
| Angina Pectoris                    | 8 | 2/4 (50%)  | 2/4 (50%)  | Age Factors (100%); Gender Identity (100%); Body Weight (50%); Diabetes Mellitus (50%); Myocardial Infarction (50%)                                |
| Gout                               | 8 | 5/11 (45%) | 3/4 (75%)  | Glomerular Filtration Rate (60%); Renal Insufficiency (60%); Age Factors (40%); Comorbidity (40%); Diuretics (40%)                                 |
| Parkinson Disease                  | 8 | 4/38 (11%) | 4/12 (33%) | <b>Parkinson Disease (100%)</b> ; Age Factors (75%); Gender Identity (75%); Body Weight (25%); Depression (25%)                                    |
| Idiopathic Interstitial Pneumonias | 7 | 3/8 (38%)  | 3/8 (38%)  | Vital Capacity (67%); Age Factors (33%); Cigarette Smoking (33%); Geographic Locations (33%); Hydroxymethylglutaryl-CoA Reductase Inhibitors (33%) |
| Thromboembolism                    | 7 | 1/4 (25%)  | 1/1 (100%) | Age Factors (100%); Embolism and Thrombosis (100%); Gender Identity (100%); Obesity (100%); Specialties, Surgical (100%)                           |
| Alzheimer Disease                  | 6 | 4/31 (13%) | 4/16 (25%) | <b>Alzheimer Disease (50%)</b> ; Dementia (50%); Apolipoprotein A-I (25%); Gender Identity (25%); Mental Status and Dementia Tests (25%)           |
| Multiple Sclerosis                 | 6 | 2/8 (25%)  | 2/6 (33%)  | Age Factors (100%); complex (100%); Coronary Artery Disease (50%); Gender Identity (50%); <b>Multiple Sclerosis (50%)</b>                          |
| Prediabetic State                  | 6 | 1/1 (100%) | 1/1 (100%) | Body Mass Index (100%); Body Weight (100%); Diabetes Mellitus (100%); Gender Identity (100%); Racial Groups (100%)                                 |
| Venous Thrombosis                  | 6 | 2/21 (10%) | 2/5 (40%)  | Age Factors (50%); Body Weight (50%); Gender Identity (50%); Neoplasms (50%); Renal Insufficiency (50%)                                            |
| Ischemic Attack, Transient         | 5 | 1/1 (100%) | 1/1 (100%) | Age Factors (100%); Coronary Artery Disease (100%); Gender Identity (100%); Racial Groups (100%)                                                   |
| Lupus Nephritis                    | 5 | 1/4 (25%)  | 1/1 (100%) | Cyclophosphamide (100%); Gender Identity (100%); Geographic Locations (100%); Racial Groups (100%)                                                 |
| Spondylarthropathies               | 5 | 1/1 (100%) | 1/1 (100%) | Age Factors (100%); Antirheumatic Agents (100%); Axial Spondyloarthritis (100%); Gender Identity (100%); Tumor Necrosis Factor Inhibitors (100%)   |
| Migraine Disorders                 | 3 | 2/22 (9%)  | 2/11 (18%) | Adrenergic beta-Antagonists (50%); <b>Migraine Disorders (50%)</b> ; sumatriptan (50%)                                                             |
| Raynaud Disease                    | 3 | 1/1 (100%) | 1/1 (100%) | Blood Pressure (100%); Gender Identity (100%)                                                                                                      |
| Retinal Vein Occlusion             | 2 | 1/4 (25%)  | 1/2 (50%)  | Macular Edema (100%)                                                                                                                               |
| Rhinitis                           | 2 | 2/41 (5%)  | 2/11 (18%) | Geographic Locations (50%)                                                                                                                         |
| Esophagitis                        | 1 | 1/10 (10%) | 1/1 (100%) | unclassifiable (100%)                                                                                                                              |
| Urinary Bladder, Overactive        | 1 | 1/39 (3%)  | 1/14 (7%)  | Urinary Bladder Diseases (100%)                                                                                                                    |

Some trials might correspond to multiple index conditions, we kept the commonest condition among 2,235 trials for simplicity; the number for some subgroups is the same in the 5th place and only one was kept based on the alphabetical order; the subgroup in bold is the subgroup same as the condition term with additional information such as type, severity, duration etc; n<sub>T</sub>: number of trials with subgroup reporting among 2,235 trials; n<sub>R</sub>: number of trials with subgroup reporting among 1,082 trials with results reporting; N<sub>R</sub>: trials with results reporting and N<sub>R</sub> = 1,082.

Coefficients from regression models.

Supplementary Table 4.1. Coefficients from the total number of subgroups model.

| Term                               | OR 95%CI          |
|------------------------------------|-------------------|
| Start year                         | 1.02 (1.02, 1.02) |
| Number of arms > 2                 | 1.01 (0.99, 1.04) |
| log (enrolment, base = 10)         | 1.69 (1.65, 1.73) |
| Industry1                          | 1 (0.97, 1.03)    |
| Duration of follow up              | 1.03 (1.02, 1.03) |
| Acute Coronary Syndrome            | 1.43 (1.25, 1.64) |
| Alzheimer Disease                  | 0.72 (0.4, 1.19)  |
| Angina Pectoris                    | 1.43 (0.94, 2.1)  |
| Arthritis, Psoriatic               | 0.92 (0.68, 1.23) |
| Arthritis, Rheumatoid              | 1.45 (1.26, 1.67) |
| Atherosclerosis                    | 2.12 (1.83, 2.46) |
| Atrial Fibrillation                | 2.11 (1.86, 2.4)  |
| Colitis, Ulcerative                | 1.64 (1.38, 1.95) |
| Coronary Artery Disease            | 2.31 (2.06, 2.6)  |
| Crohn Disease                      | 3.09 (2.72, 3.53) |
| Diabetes Mellitus                  | 1.2 (0.94, 1.51)  |
| Diabetes Mellitus, Type 1          | 0.97 (0.72, 1.27) |
| Diabetes Mellitus, Type 2          | 2.3 (2.05, 2.58)  |
| Esophagitis                        | 0.29 (0, 2.11)    |
| Gastroesophageal Reflux            | 0.23 (0.04, 0.69) |
| Gout                               | 0.99 (0.72, 1.31) |
| Heart Failure                      | 2.09 (1.85, 2.37) |
| Hypercholesterolemia               | 2.63 (2.34, 2.96) |
| Hypertension                       | 1.87 (1.66, 2.12) |
| Idiopathic Interstitial Pneumonias | 0.89 (0.5, 1.46)  |
| Ischemic Attack, Transient         | 0.83 (0.45, 1.38) |
| Lupus Erythematosus, Systemic      | 1.04 (0.74, 1.43) |
| Lupus Nephritis                    | 1.36 (0.81, 2.13) |
| Migraine Disorders                 | 0.45 (0.08, 1.34) |
| Multiple Sclerosis                 | 0.97 (0.5, 1.68)  |
| Myocardial Infarction              | 2.19 (1.96, 2.47) |
| Osteoarthritis                     | 1.39 (1.11, 1.73) |
| Osteoporosis                       | 1.28 (1.08, 1.51) |

|                                        |                   |
|----------------------------------------|-------------------|
| Parkinson Disease                      | 1 (0.7, 1.4)      |
| Peripheral Arterial Disease            | 1.65 (1.44, 1.88) |
| Prediabetic State                      | 0.87 (0.7, 1.07)  |
| Prostatic Hyperplasia                  | 2.85 (2.45, 3.31) |
| Psoriasis                              | 1.12 (0.95, 1.33) |
| Pulmonary Disease, Chronic Obstructive | 1.45 (1.29, 1.64) |
| Pulmonary Embolism                     | 2.58 (1.92, 3.4)  |
| Retinal Vein Occlusion                 | 0.48 (0.14, 1.19) |
| Rhinitis                               | 0.31 (0.01, 1.47) |
| Seizures                               | 1.01 (0.75, 1.34) |
| Spondylarthropathies                   | 1.26 (0.65, 2.18) |
| Spondylitis, Ankylosing                | 1.27 (0.91, 1.73) |
| Stroke                                 | 1.93 (1.64, 2.27) |
| Thromboembolism                        | 1.67 (1.04, 2.52) |
| Urinary Bladder, Overactive            | 0.27 (0, 1.99)    |
| Urticaria                              | 2.84 (2.15, 3.7)  |
| Venous Thromboembolism                 | 1.43 (1.23, 1.68) |
| Venous Thrombosis                      | 0.81 (0.63, 1.03) |

Supplementary Table 4.2. Coefficients from subgroup reporting (any vs none) model.

| Term                       | OR 95%CI            |
|----------------------------|---------------------|
| Start year                 | 1.07 (1.03, 1.11)   |
| Duration of follow up      | 1.13 (1.04, 1.24)   |
| Number of arms > 2         | 1 (0.73, 1.37)      |
| log (enrolment, base = 10) | 3.48 (2.25, 5.47)   |
| Industry1                  | 1.58 (0.94, 2.69)   |
| Acute Coronary Syndrome    | 10.44 (1.57, 210.5) |
| Alzheimer Disease          | 1.12 (0.27, 4.05)   |
| Angina Pectoris            | 5.22 (0.57, 48.21)  |
| Arthritis, Psoriatic       | 7.62 (0.87, 163.78) |
| Arthritis, Rheumatoid      | 1.66 (0.75, 3.73)   |
| Atherosclerosis            | 5.46 (0.3, 143.72)  |
| Atrial Fibrillation        | 4.26 (1.37, 14.07)  |
| Colitis, Ulcerative        | 5.12 (1.39, 21.75)  |
| Coronary Artery Disease    | 3.44 (1.34, 9.09)   |
| Crohn Disease              | 7.06 (1.92, 30.14)  |
| Diabetes Mellitus          | 4.05 (1.14, 14.81)  |
| Diabetes Mellitus, Type 1  | 1.6 (0.49, 5.1)     |
| Diabetes Mellitus, Type 2  | 2.44 (1.31, 4.72)   |
| Gastroesophageal Reflux    | 4.19 (0.81, 24.01)  |
| Gout                       | 8 (0.93, 170.12)    |
| Heart Failure              | 3.06 (1.08, 9.01)   |
| Hypercholesterolemia       | 4.96 (2.09, 12.26)  |
| Hypertension               | 2.48 (1.21, 5.22)   |

|                                        |                     |
|----------------------------------------|---------------------|
| Idiopathic Interstitial Pneumonias     | 1.7 (0.31, 7.94)    |
| Lupus Erythematosus, Systemic          | 8.85 (1.18, 181.81) |
| Migraine Disorders                     | 1.1 (0.15, 5.07)    |
| Multiple Sclerosis                     | 0.53 (0.03, 4.17)   |
| Myocardial Infarction                  | 9.86 (2.94, 40.48)  |
| Osteoarthritis                         | 0.85 (0.24, 2.63)   |
| Osteoporosis                           | 2.45 (0.82, 7.34)   |
| Parkinson Disease                      | 2.18 (0.49, 8.84)   |
| Peripheral Arterial Disease            | 2.79 (0.15, 77.92)  |
| Prostatic Hyperplasia                  | 3.92 (1.19, 13.71)  |
| Psoriasis                              | 0.84 (0.31, 2.2)    |
| Pulmonary Disease, Chronic Obstructive | 1.24 (0.6, 2.61)    |
| Retinal Vein Occlusion                 | 3.48 (0.13, 95.06)  |
| Rhinitis                               | 0.91 (0.13, 4.18)   |
| Seizures                               | 3.85 (0.99, 15.59)  |
| Spondylitis, Ankylosing                | 1.87 (0.34, 8.97)   |
| Stroke                                 | 3.85 (0.77, 22.09)  |
| Urinary Bladder, Overactive            | 0.15 (0.01, 0.88)   |
| Urticaria                              | 7.49 (0.67, 168.83) |
| Venous Thromboembolism                 | 6.99 (0.86, 150.52) |
| Venous Thrombosis                      | 1.87 (0.22, 13.33)  |

Supplementary Table 4.3. Coefficients from overall results reporting (any vs none) model.

| Term                       | OR 95%CI           |
|----------------------------|--------------------|
| Start year                 | 0.97 (0.95, 0.99)  |
| Duration of follow up      | 1.1 (1.03, 1.18)   |
| Number of arms > 2         | 1.42 (1.15, 1.74)  |
| log (enrolment, base = 10) | 1.63 (1.22, 2.19)  |
| Industry1                  | 1.03 (0.73, 1.45)  |
| Acute Coronary Syndrome    | 0.93 (0.35, 2.43)  |
| Alzheimer Disease          | 1.15 (0.51, 2.56)  |
| Arthritis, Psoriatic       | 4.2 (0.58, 84.42)  |
| Arthritis, Rheumatoid      | 1.71 (1, 2.94)     |
| Atherosclerosis            | 0.54 (0.11, 2.24)  |
| Atrial Fibrillation        | 1.03 (0.49, 2.21)  |
| Brain Ischemia             | 0.61 (0.02, 16.09) |
| Cerebral Infarction        | 0.42 (0.09, 1.54)  |
| Colitis, Ulcerative        | 7.26 (1.87, 48.04) |
| Coronary Artery Disease    | 1.2 (0.65, 2.23)   |
| Crohn Disease              | 7.85 (2.04, 51.75) |
| Diabetes Mellitus          | 0.76 (0.34, 1.66)  |
| Diabetes Mellitus, Type 1  | 1.37 (0.64, 2.93)  |
| Diabetes Mellitus, Type 2  | 1.41 (0.95, 2.08)  |
| Diabetic Nephropathies     | 0.4 (0.02, 3.2)    |

|                                        |                    |
|----------------------------------------|--------------------|
| Enuresis                               | 0.51 (0.02, 4.08)  |
| Esophagitis                            | 0.13 (0.01, 0.72)  |
| Gastroesophageal Reflux                | 0.48 (0.18, 1.18)  |
| Gout                                   | 0.63 (0.16, 2.21)  |
| Heart Failure                          | 1.96 (0.92, 4.32)  |
| Hypercholesterolemia                   | 1.7 (0.95, 3.07)   |
| Hyperlipidemias                        | 1.01 (0.13, 6.37)  |
| Hypertension                           | 0.94 (0.6, 1.45)   |
| Lupus Erythematosus, Systemic          | 1.8 (0.42, 9.18)   |
| Lupus Nephritis                        | 0.31 (0.02, 2.6)   |
| Migraine Disorders                     | 1.87 (0.72, 4.98)  |
| Multiple Sclerosis                     | 2.46 (0.5, 17.89)  |
| Myocardial Infarction                  | 1.8 (0.85, 3.9)    |
| Osteoarthritis                         | 0.94 (0.49, 1.77)  |
| Osteoporosis                           | 1.22 (0.59, 2.52)  |
| Parkinson Disease                      | 0.62 (0.26, 1.4)   |
| Peripheral Arterial Disease            | 0.75 (0.13, 4.48)  |
| Prostatic Hyperplasia                  | 1.56 (0.68, 3.59)  |
| Psoriasis                              | 1.68 (0.9, 3.17)   |
| Pulmonary Disease, Chronic Obstructive | 1.48 (0.93, 2.36)  |
| Pulmonary Embolism                     | 0.82 (0.03, 21.15) |
| Restless Legs Syndrome                 | 1.55 (0.46, 5.23)  |
| Retinal Vein Occlusion                 | 1.31 (0.15, 11.48) |
| Rhinitis                               | 0.48 (0.21, 1.03)  |
| Seizures                               | 0.68 (0.29, 1.56)  |
| Spondylitis, Ankylosing                | 1.38 (0.46, 4.2)   |
| Stroke                                 | 1.45 (0.43, 5.26)  |
| Thromboembolism                        | 0.52 (0.02, 5.61)  |
| Urinary Bladder, Overactive            | 0.78 (0.35, 1.67)  |
| Venous Thromboembolism                 | 0.26 (0.08, 0.68)  |
| Venous Thrombosis                      | 0.31 (0.1, 0.87)   |
